# Supplementary material
Source: publisher figshare collection journal article supplement (https://geolsoc.figshare.com/articles/dataset/_/3452945)
Supplement: Supplementary file 2 [file 1]

Figure A-1.

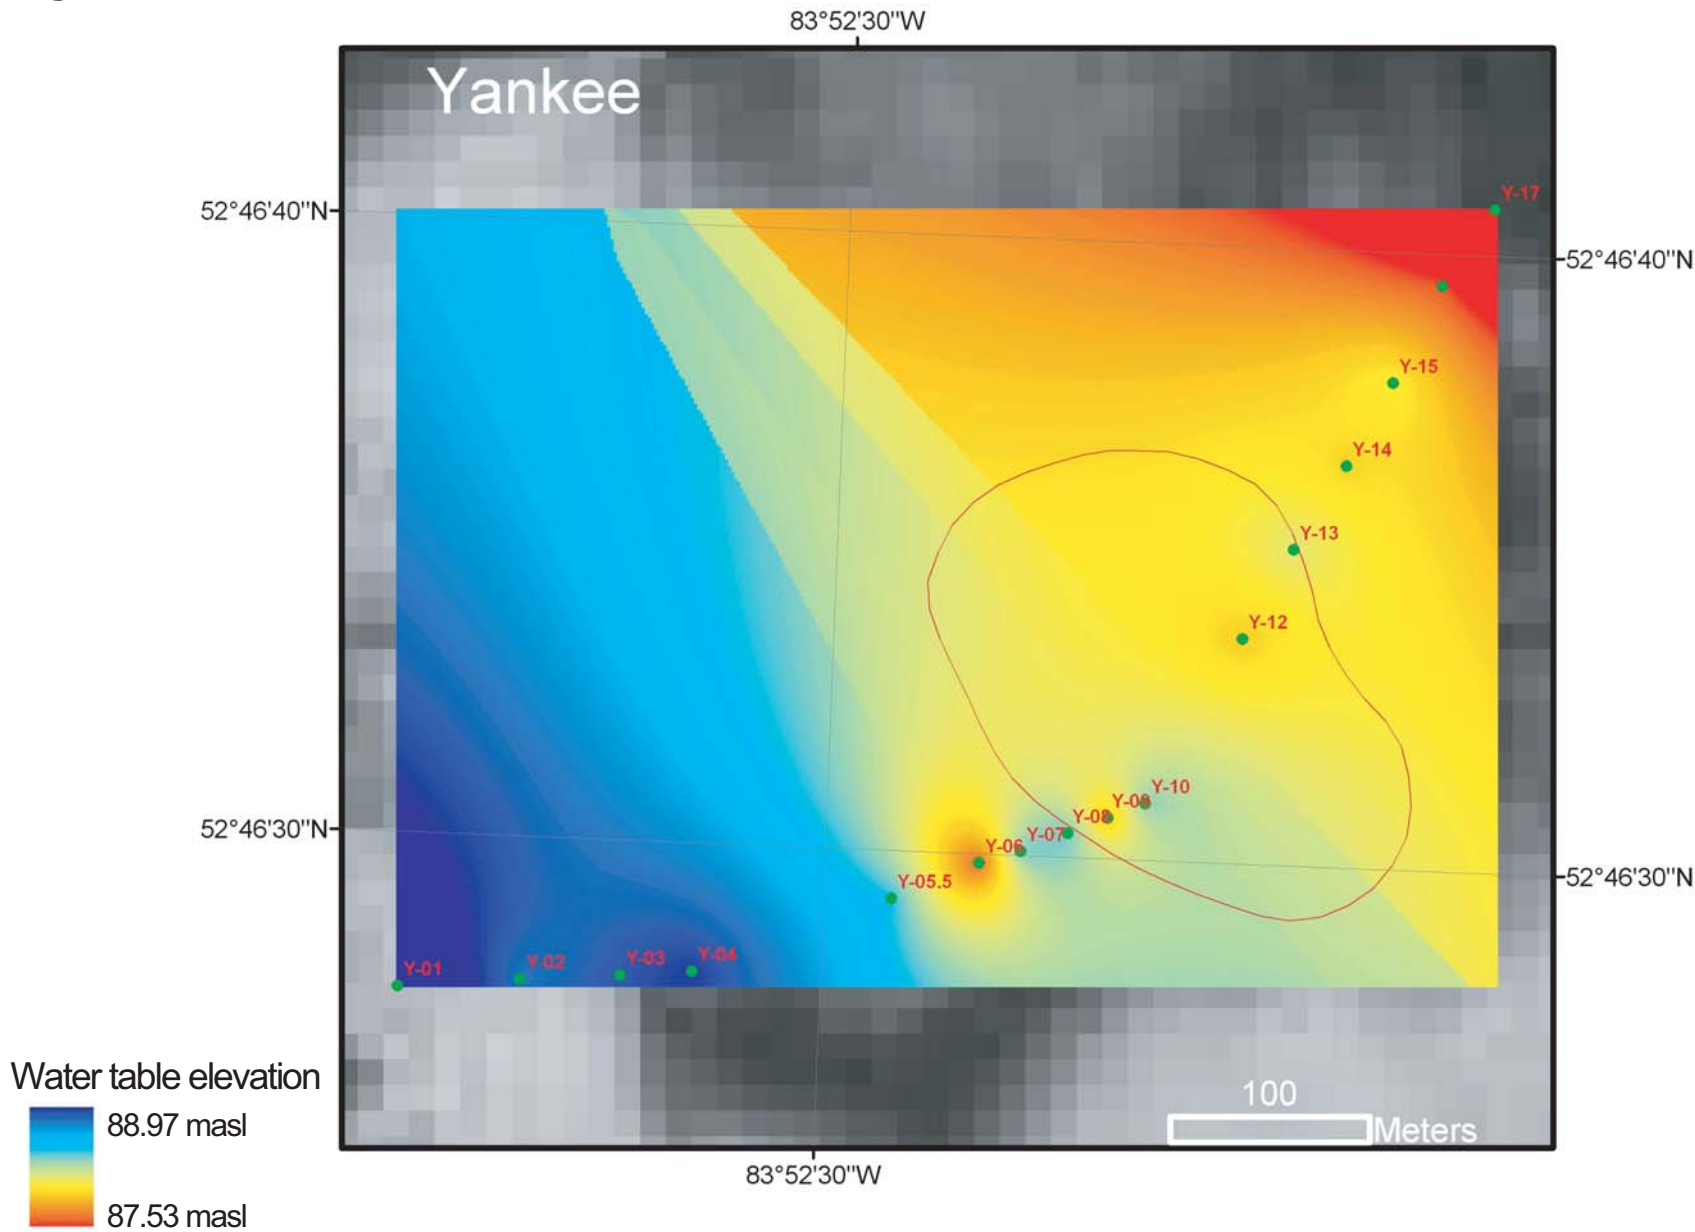

Figure A-1. Peat groundwater flow direction at Yankee based on kriging of water table data.
