# Supplementary material
Source: publisher figshare collection journal article supplement (https://geolsoc.figshare.com/articles/dataset/_/3452945)

Figure A-2.

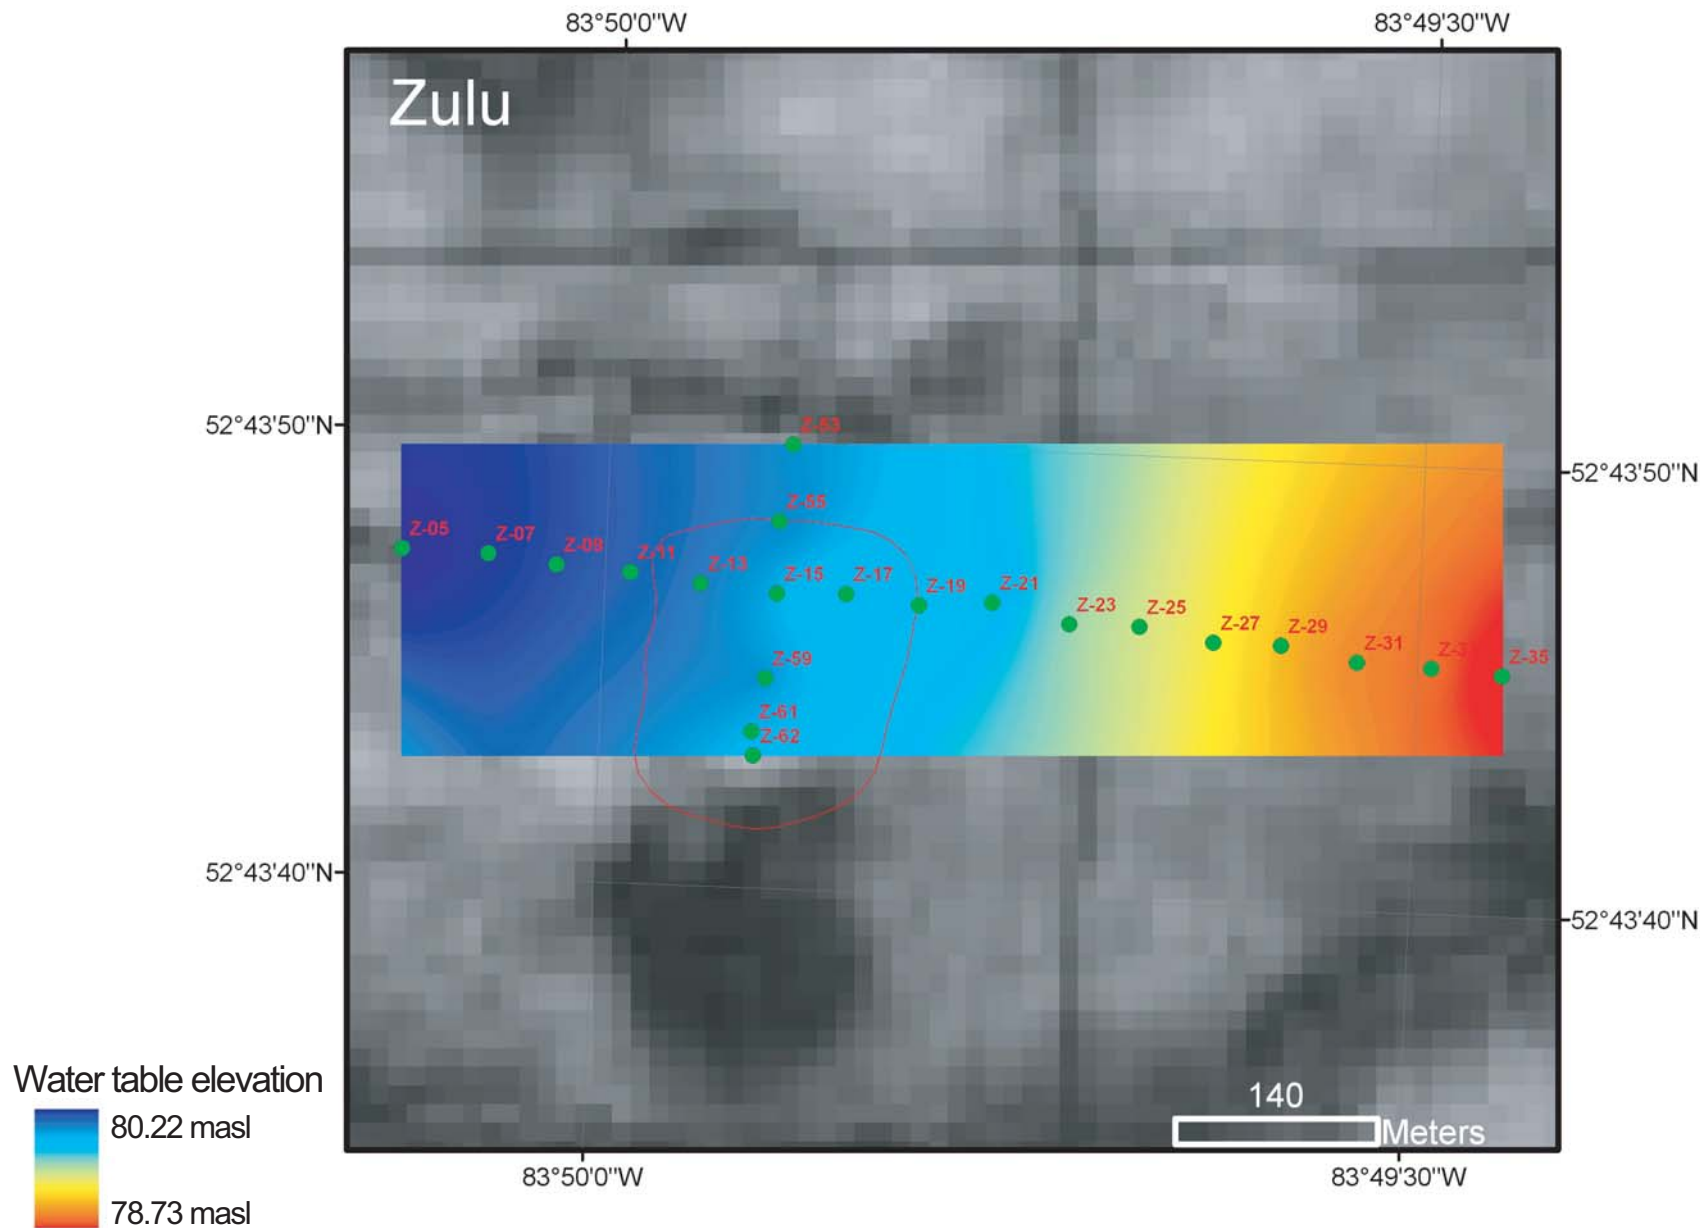

Figure A-2. Peat groundwater flow direction at Zulu based on kriging of water table data.

Supplement: Supplementary file 1 [file 1]
